# Supplementary material for: Decision-making at the limit of viability: differing perceptions and opinions between neonatal physicians and nurses
Source: Springer Nature journal article supplement (doi:10.1186/s12887-018-1040-z), 2018-02-22
Supplement: MOESM1 [file 15483910]

Readers are alerted that the Additional file 1 presented in this article has been removed due to a reported legal dispute. We are currently investigating these concerns, following which editorial action will be taken as appropriate.
